# Supplementary material for: Hyperthermia With Mild Electrical Stimulation Protects Pancreatic β-Cells From Cell Stresses and Apoptosis
Source: PubMed Central journal article supplement — Diabetes. 2012 Mar 14;61(4):838–47. doi: 10.2337/db11-1098 (PMC3314363; doi:10.2337/db11-1098), 2012-03-14

## SUPPLEMENTARY DATA

**Supplementary Table 1.** The following antibodies were used in this study.

Stressgen Biotechnologies (Victoria, BC, Canada)

Anti-HSP72 antibody: SPA-810

Santa Cruz Biotechnology (Santa Cruz, CA)

Anti-insulin antibody: sc-9168

Anti-nuclear factor of activated T-cell (NFAT) c1 antibody: sc-7294

Anti-glucose transporter (GLUT) 2 antibody: sc-9117

Anti-BiP (GRP78) antibody: sc-1050

Anti-C/EBP homologous protein (CHOP) (GADD153) antibody: sc-575

8-Hydroxy-2'-deoxyguanosine (8-OHdG) antibody: sc-66036

XBP-1 antibody: sc-7160

Anti-actin antibody: sc-1615

Cell Signaling Technology Inc. (Beverly, MA)

Anti-forkhead box O1 (FOXO1) antibody: #9462

Anti-phospho-c-jun N-terminal kinase (JNK) antibody: #9251

Anti-JNK antibody: #9252

Anti-nuclear factor-kappa B (NF-kB) p65 antibody: #4764

Anti-cleaved-caspase-3 antibody: #9661

Anti-phospho-AMPKa: #2535

Anti-AMPKa: #2532

Chemicon International Inc. (Billerica, MA)

Anti-pancreatic and duodenal homeobox (PDX)-1 antibody: AB3243

a-tubulin antibody: #05-829

Upstate Biotechnology (Lake Placid, NY)

Anti-insulin receptor substrate (IRS)-2 antibody: 06-506

Biorbyt (Riverside, UK)

Anti-Annexin V antibody: orb18007

**Supplementary Table 2.** Primer sequences for quantitative real time RT-PCR.

insulin-2 FW; 5'-GCTCTCTACCTGGTGTGTGG-3',

insulin-2 RV; 5'-GTTTTATTTCATTGCAGAGGG-3',

Hsp72 FW; 5'-TGGTGCTGACGAAGATGAAG-3',

Hsp72 RV; 5'-AGGTCGAAGATGAGCACGTT-3',

PDX-1 FW; 5'-GAAATCCACCAAAGCTCACG-3',

PDX-1 RV; 5'-TTCAACATCACTGCCAGCTC-3',

BiP FW; 5'-ATCGGACGCACTTGGAATGAC-3',

BiP RV; 5'-TTCCCAAATACGCCTCAGCAG-3',

CHOP FW; 5'-CATAACACCACACCTGAAAG-3',

CHOP RV; 5'-CCGTTTCCTAGTTCTTCCTTGC-3',

b-actin-FW; 5'-CGTAAAGACCTCTATGCCAA-3',

b-actin-RV; 5'-AGCCATGCCAATGTTGTCTC-3'.

To assess the specificity of the amplified PCR products, a melting curve analysis was performed after the last cycle.

SUPPLEMENTARY DATA

**Supplementary Figure 1.** Insulin secretion capacity in MIN6 cells.

A: MIN 6 cells were incubated with 400mM palmitate for 24hr, then sham, MES, HS or HS+MES treatment were performed for 10min. After 6 and 10 hrs of these treatments, insulin concentrations in culture medium were measured by ELISA.

B: MIN 6 cells were incubated with 400mM palmitate for 24hr, then sham or HS+MES treatment were performed for 10min. After 0, 1 and 3 hrs of these treatments, cell lysates were isolated, and AMPK and phospho-AMPK levels were determined by Western blot.

\* $p < 0.05$ , \*\* $p < 0.01$  vs. sham-treated control.

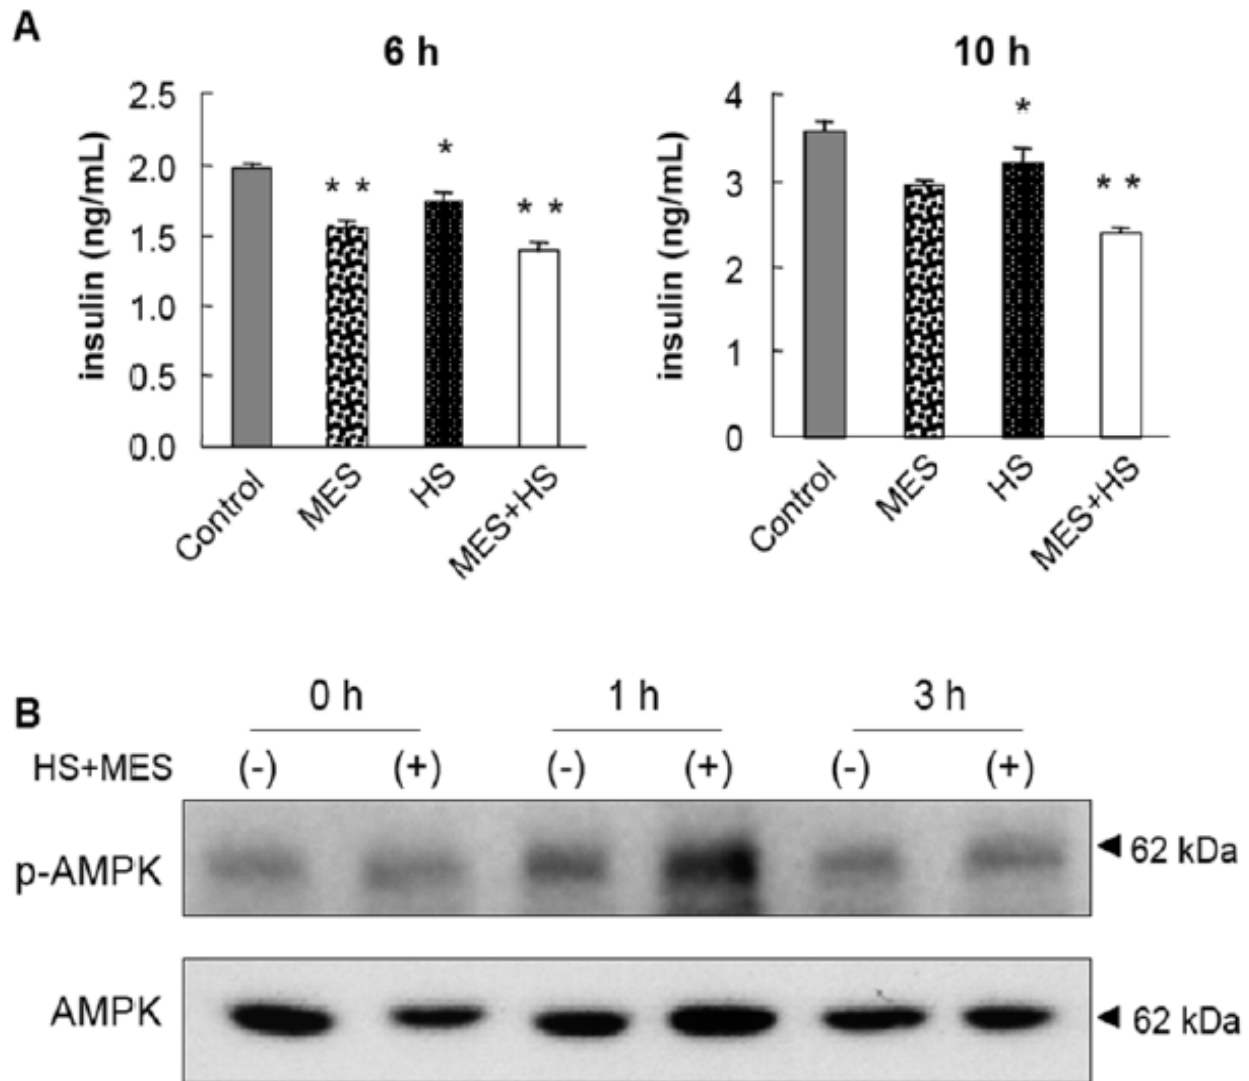

SUPPLEMENTARY DATA

**Supplementary Figure 2.** Molecular markers of pancreatic  $\beta$ -cell integrity and function.

Immunohistochemical analysis of molecular markers associated with pancreatic  $\beta$ -cell integrity and function (a and b; NFAT/insulin, c and d; GLUT2, e and f; IRS-2).

GLUT2 and IRS-2 protein were determined by Western blotting, and the expression levels were corrected using internal control,  $\alpha$ -tubulin.

\* $p < 0.05$ , \*\* $p < 0.01$ , N.S. vs. sham-treated wt control. # $p < 0.05$  vs. indicated group.

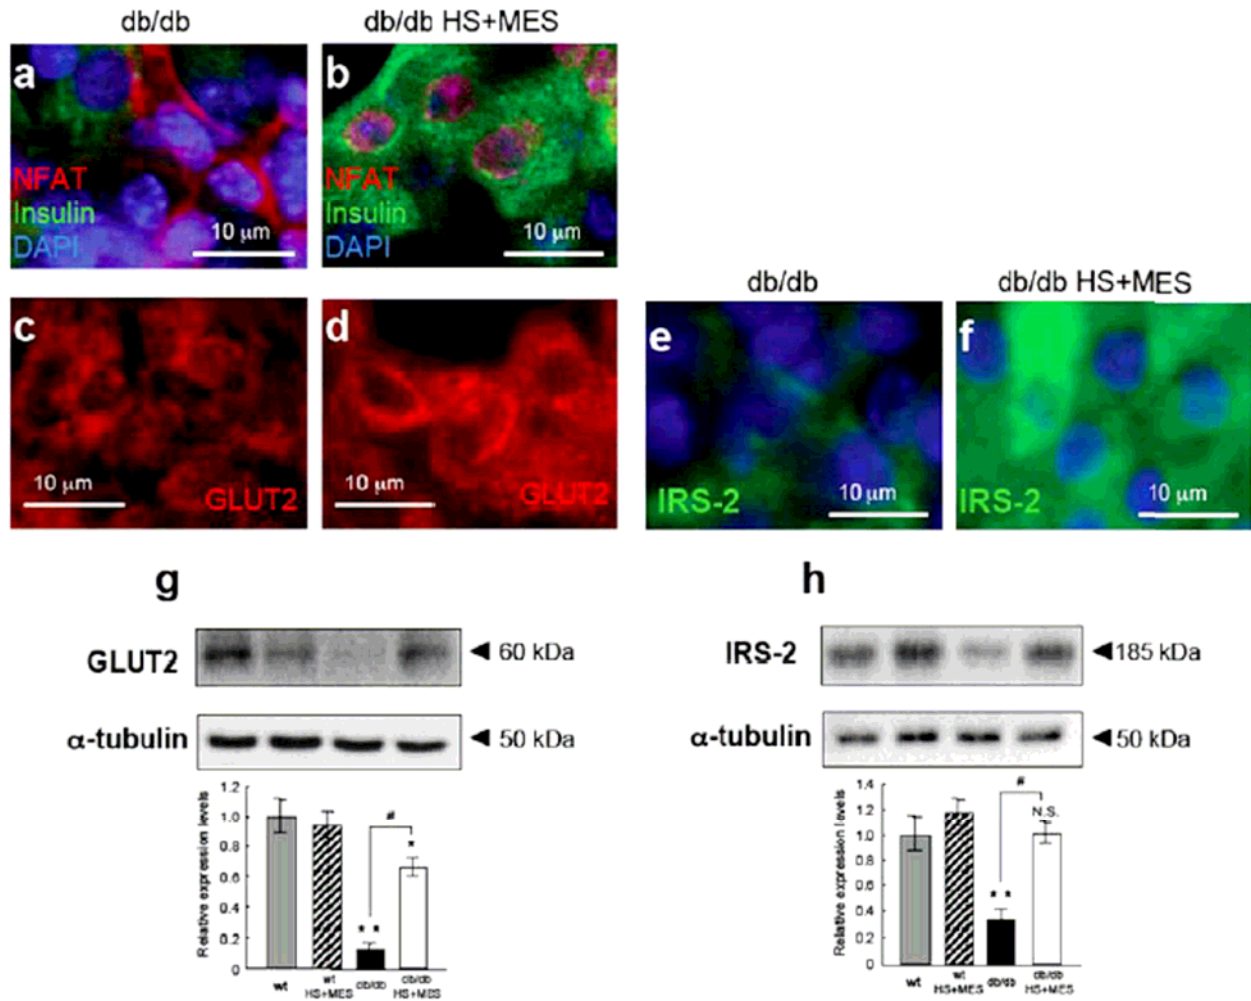

SUPPLEMENTARY DATA

**Supplementary Figure 3.** Molecular markers of apoptotic signal, inflammation and oxidative stress in pancreatic  $\beta$ -cells.

Immunohistochemical analysis of molecular markers associated with apoptosis (A: a and b; Cleaved caspase-3, c and d; Annexin-V), inflammation (B: a and b; NF- $\kappa$ B) and oxidative stress (B: c and d; 8-OHdG) in sham-treated db/db and HS+MES treated db/db islets.

Cleaved caspase-3 protein were determined by Western blotting, and the expression levels were corrected using internal control,  $\alpha$ -tubulin.

\*\* $p < 0.01$ , N.S. vs. sham-treated wt control. #  $p < 0.05$  vs. indicated group.

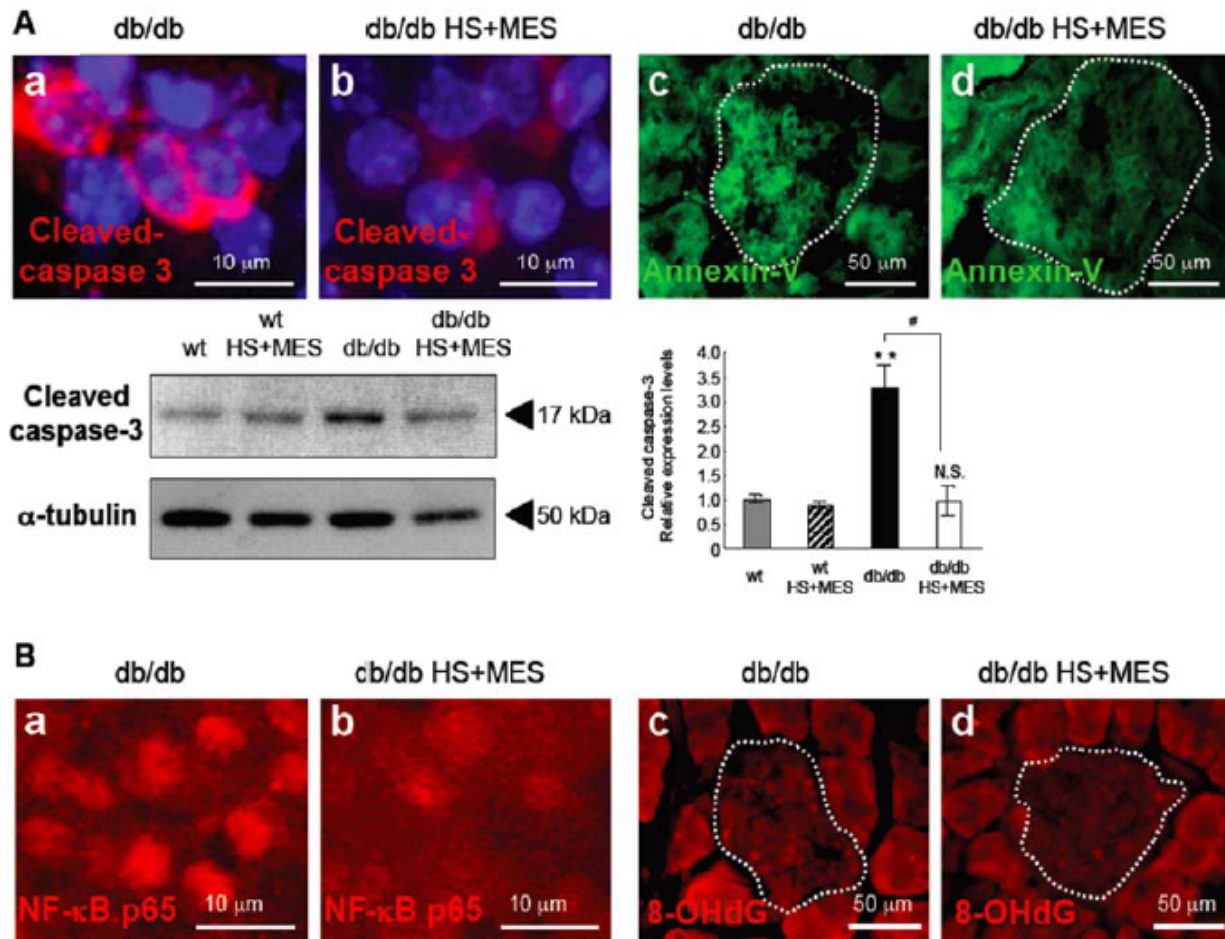

Supplement: supp_db11-1098_DB111098SupplementaryData.pdf [file supp_db11-1098_DB111098SupplementaryData.pdf]
